1 **An integrative systems biology and experimental approach identifies**  
2 **convergence of epithelial plasticity, metabolism, and autophagy to promote**  
3 **chemoresistance**

4

5 Shengnan Xu<sup>1</sup>, Kathryn E. Ware<sup>1</sup>, Yuantong Ding<sup>2</sup>, So Young Kim<sup>3</sup>, Maya Sheth<sup>1</sup>, Sneha  
6 Rao<sup>4</sup>, Wesley Chan<sup>1</sup>, Andrew J. Armstrong<sup>1,5</sup>, William C. Eward<sup>4</sup>, Mohit K. Jolly<sup>6,7\*</sup>, and  
7 Jason A. Somarelli<sup>1\*</sup>.

8

9 <sup>1</sup>Duke Cancer Institute and the Department of Medicine, Duke University Medical  
10 Center, Durham, NC, 27710; <sup>2</sup>Department of Biology, Duke University Medical Center,  
11 Durham, NC, 27710; <sup>3</sup>Department of Molecular Genetics and Microbiology, Duke  
12 University Medical Center, Durham, NC, 27710; <sup>4</sup>Department of Orthopaedic Surgery;  
13 <sup>5</sup>Solid Tumor Program and the Duke Prostate Center, Duke University Medical Center,  
14 Durham, NC, 27710, USA; <sup>6</sup>Center for Theoretical Biological Physics, <sup>7</sup>Department of  
15 Bioengineering, Rice University, Houston, TX 77005-1827, USA;

16

17 \*Address correspondence to [jason.somarelli@duke.edu](mailto:jason.somarelli@duke.edu) or [mkjolly.15@gmail.com](mailto:mkjolly.15@gmail.com)

18

19

20

21

22

23 **Keywords.** Evolution, systems biology, autophagy, lung cancer, epithelial-mesenchymal  
24 transition, tumor invasiveness, metabolism

25

26 **Abstract**

27 The evolution of therapeutic resistance is a major cause of death for patients with solid  
28 tumors. The development of therapy resistance is shaped by the ecological dynamics  
29 within the tumor microenvironment and the selective pressure induced by the host  
30 immune system. These ecological and selective forces often lead to evolutionary  
31 convergence on one or more pathways or hallmarks that drive progression. These  
32 hallmarks are, in turn, intimately linked to each other through gene expression  
33 networks. Thus, a deeper understanding of the evolutionary convergences that occur at  
34 the gene expression level could reveal vulnerabilities that could be targeted to treat  
35 therapy-resistant cancer. To this end, we used a combination of phylogenetic clustering,  
36 systems biology analyses, and wet-bench molecular experimentation to identify  
37 convergences in gene expression data onto common signaling pathways. We applied  
38 these methods to derive new insights about the networks at play during TGF- $\beta$ -  
39 mediated epithelial-mesenchymal transition in a lung cancer model system.  
40 Phylogenetics analyses of gene expression data from TGF- $\beta$  treated cells revealed  
41 evolutionary convergence of cells toward amine-metabolic pathways and autophagy  
42 during TGF- $\beta$  treatment. Using high-throughput drug screens, we found that  
43 knockdown of the autophagy regulatory, ATG16L1, re-sensitized lung cancer cells to  
44 cancer therapies following TGF- $\beta$ -induced resistance, implicating autophagy as a TGF- $\beta$ -  
45 mediated chemoresistance mechanism. Analysis of publicly-available clinical data sets  
46 validated the adverse prognostic importance of ATG16L expression in multiple cancer  
47 types including kidney, lung, and colon cancer patients. These analyses reveal the  
48 usefulness of combining evolutionary and systems biology methods with experimental  
49 validation to illuminate new therapeutic vulnerabilities.

50

## 51 **Introduction**

52 Mammalian cells respond to external stimuli through a coordinated system of  
53 signaling and gene expression circuitry. The inputs to this system are often the  
54 ligands for receptors, which initiate signaling cascades that ultimately lead to  
55 changes in gene expression. A cell can receive, process, and integrate multiple  
56 simultaneous inputs and respond to them with a coordinated phenotypic  
57 response [1, 2].

58 Deregulation of the cellular signaling/response circuitry is a fundamental  
59 theme in cancer at both the tissue and single-cell levels. Indeed, deregulated  
60 intracellular signaling/gene expression circuitry is fundamental to many cancer  
61 hallmarks [3], including sustaining proliferation [4, 5], evading growth  
62 suppression [5], inducing angiogenesis [5], tumor-promoting inflammation[5],  
63 invasion [6], and metastasis [7-9].

64 One well-studied signaling/expression circuit that is frequently  
65 dysregulated in cancer is the transforming growth factor  $\beta$  (TGF- $\beta$ )/SMAD axis.  
66 The TGF- $\beta$ /SMAD axis is a critical developmental pathway that controls  
67 differentiation and proliferation[10]. TGF- $\beta$ /SMAD signaling is also important in  
68 wound healing and fibrosis (reviewed in [11, 12]). One of the major phenotypic  
69 outputs of TGF- $\beta$ /SMAD signaling is the phenotypic switch from an epithelial to a  
70 mesenchymal state, known traditionally as epithelial-mesenchymal transition  
71 (EMT) (reviewed in [13]). In the context of cancer, TGF- $\beta$ -mediated EMT  
72 promotes downregulation of cell-cell adhesion and upregulation of migration and  
73 invasion [14, 15]. This pro-invasive phenotype is usually activated at the expense  
74 of proliferation [15, 16]: TGF- $\beta$  induces potent cell cycle arrest through SMAD-  
75 mediated transcriptional activation of the cell cycle repressor, p21 [17]. TGF- $\beta$

76 also reprograms cellular metabolism [18] and induces autophagy [19]—a process  
77 in which a cell self-digests its proteins and organelles. In addition to its cell  
78 autonomous role in promoting invasiveness, TGF- $\beta$  also acts non-cell  
79 autonomously to create a tumor microenvironment more permissive to tumor  
80 growth [20, 21]. These mechanisms can often drive resistance to chemotherapy  
81 and multiple targeted therapies [22, 23].

82         However, the abovementioned effects of TGF- $\beta$ /SMAD-induced EMT are  
83 typically studied in isolation with focus on a few nodes of the pathway, hence  
84 neglecting the effects of crosstalk among multiple signaling pathways. Such  
85 crosstalk can often generate feedback loops with nonlinear dynamics, giving rise  
86 to emergent, complex, and non-intuitive behavior [24]. Hence, a systems biology  
87 approach integrating computational and experimental components can be  
88 essential to elucidating the dynamics of underlying interconnected cellular  
89 circuitry and identifying the fundamental organizational principles driving tumor  
90 progression [25]. Here we used such an approach, incorporating multiple systems  
91 biology tools to analyze the dynamics of TGF- $\beta$ -mediated EMT and to  
92 experimentally validate the computationally-derived insights (**Figure 1**).

93         Cancer progression is an evolutionary process of selection over time [26,  
94 27]. Therefore, we postulated that tools developed for tracing evolutionary  
95 histories may provide new insights. One of the most commonly-used methods of  
96 inferring ancestral relationships is phylogenetics. Phylogenetics uses a data  
97 matrix of character states to infer evolutionary relationships between groups  
98 [28]. Although phylogenetics was originally developed to reconstruct ancestral  
99 relationships between species, phylogenetic inference has also been applied to

100 diverse data sets for which no underlying ancestral relationships exist, such as  
101 geography, linguistics, or astrophysics [28].

102         Given the flexibility of phylogenetics as a clustering tool for multiple data  
103 types and contexts, we hypothesized that analysis of time-course gene expression  
104 data could provide crucial information about how circuits are integrated to lead  
105 to a given phenotype. We identified a convergence of gene expression data on  
106 amine metabolism pathways following TGF- $\beta$ -induced EMT, and validated up-  
107 regulation of ammonia production using wet bench experimentation.

108 Interestingly, we also identified ATG16L1, a regulator of autophagy, as a central  
109 node in an ammonia production gene network, suggesting connections between  
110 elevated amine metabolism, EMT, and autophagy. ATG16L1 was also found to be  
111 upregulated during TGF- $\beta$ -induced EMT. Finally, using high throughput drug  
112 screens, we showed that siRNA-mediated inhibition of the autophagy regulator,  
113 ATG16L1, rescued TGF- $\beta$ -mediated chemo-resistance. Together, this iterative  
114 combination of systems-based analyses and experimental validations suggests  
115 that TGF- $\beta$ -mediated EMT converges on a gene expression network to induce  
116 autophagy and altered metabolism that can be therapeutically targeted to  
117 overcome chemoresistance.

118

119

120

121

122

123

124

## 125 **Results**

126

127 *Phylogenetics analyses provide a simple and reliable tool to visualize gene*

128 *expression dynamics*

129 To test the feasibility and effectiveness of using phylogenetics as a

130 clustering tool to analyze gene expression data, we tested if phylogenetic trees

131 could recapitulate the temporal order of gene expression data collected at

132 different time points. To do this, we constructed dendograms from publicly-

133 available microarray data for immortalized prostate cells collected every 10

134 passages from 0 to 80 passages (GSE23038, [29]).

135 We first used distance-based trees to infer temporal relationships among

136 the samples. We first used distance-based trees to infer temporal relationships

137 among the samples. Distance-based trees use a data matrix comprised of gene

138 expression values as a continuous variable without the need for binning gene

139 expression data into categorical variables of being upregulated, unchanged, and

140 downregulated. Distance-based construction of a rooted tree with root at passage

141 0 produced a tree topology that, with the exception of passage 70, clustered

142 samples according to their temporal order from passage 10 to 80 (**Figure 2A**).

143 We also analyzed GSE23038 [29] using maximum-likelihood and

144 parsimony phylogenetics methods. The raw data matrix was converted into three

145 character states based on a neutral evolution model, JC69, before being used as

146 input for these two methods of tree construction. Importantly, for all three

147 methods, trees constructed using gene expression data recapitulated the known

148 temporal structure of the data with robust bootstrap support (**Figure 2A-C**,

149 bootstrap values indicated above branches). A comparison of the three cladistical

150 methods with clustering revealed that hierarchical clustering was unable to  
151 accurately reconstruct the temporal order of passages (**Figure 2D-E**).

152 Similarly, we performed phylogenetic clustering on additional data sets  
153 where samples had been analyzed longitudinally, including GSE17708 [30],  
154 microarray data from A549 lung adenocarcinoma cells treated with TGF- $\beta$  over a  
155 period of 72 hours, and GSE12548, microarray data from human ARPE-19 retinal  
156 pigment epithelium cells treated with TGF- $\beta$  and TNF- $\alpha$  over 60 hours [31]. For  
157 both of these data sets, phylogenetic clustering reconstructed the temporal order  
158 of treatments with strong bootstrap support (**Figure 3A and B**).

159

160 *Analyzing dynamics of TGF- $\beta$  treatment through visualization of tree structure*  
161 *reveals two distinct temporally resolved clades*

162 A major advantage of clustering is its ability to easily visualize  
163 relationships between large data sets and to derive novel useful insights. For  
164 example, re-analysis of microarray data from A549 cells treated with TGF- $\beta$  over  
165 72 hours (GSE17708) revealed two distinctive patterns in the resulting  
166 phylogenies. First, early time points (0–8 hours) were haphazardly organized in  
167 clades and sub-clades, where replicates of samples were admixed, indicating that  
168 phylogenetic analyses were not able to provide a clear signal based on the  
169 expression data that would predict timing of treatment (**Figure 4A**). Second, the  
170 later time points ( $\geq 8$  hours) were well resolved, suggesting the presence of a  
171 clear signal emerging in the gene expression data following long term treatment  
172 with TGF- $\beta$  (**Figure 4A**).

173 Consistent with a convergence of signal at later time points, RT-qPCR  
174 analysis of the epithelial marker, E-cadherin, and the mesenchymal marker,

175 vimentin, demonstrated that E-cadherin suppression and vimentin activation  
176 were not apparent until this bifurcation of early admixed time-points vs. resolved  
177 late time-points (**Figure 4B**). Likewise, our time lapse imaging analysis of growth  
178 rate between vehicle-treated and TGF- $\beta$ -treated A549 cells showed that  
179 differences in growth rate between the two conditions were not observed until  
180 ~72 hours after the initiation of treatment (**Figure 4C**), consistent with reports  
181 demonstrating that EMT induces cell cycle arrest [32, 33]. These experimental  
182 results suggest that the timing of both gene expression and phenotypic traits  
183 associated with EMT are consistent with the convergence of an emerging signal at  
184 late time points within the dendograms.

185         Next, we extracted genes that were differentially expressed across the two  
186 major clades of early and late treatment times. Pathway analysis of these genes  
187 showed that multiple amine-metabolism pathways were significantly altered  
188 during TGF- $\beta$  treatment (**Figure 4D**). To experimentally test if ammonia  
189 metabolism was altered during TGF- $\beta$  treatment, we performed ammonia  
190 production assays on A549 cells. Importantly, we found that ammonia production  
191 was altered significantly upon TGF- $\beta$  treatment at later time points, with little  
192 change in ammonia production during earlier time points (**Figure 4E**). Together,  
193 these analyses demonstrated the utility of simple visualizations, such as  
194 phylogenetic trees and clustering dendograms, to yield new testable hypotheses.

195

#### 196 *Gene expression networks couple ammonia production to autophagy*

197         Previous research has identified a connection between up-regulation of  
198 ammonia production and induction of autophagy (7). Based on this connection,  
199 we tested if TGF- $\beta$ -induced EMT led to an increase in autophagy markers. In



200 support of this hypothesis, TGF- $\beta$  treatment led to upregulation of autophagy  
201 markers LC3A/B and ATG16L1 (**Figure 5A**). To better understand the  
202 connections between ammonia production and autophagy, we used Cytoscape to  
203 construct gene regulatory networks related to amine metabolism genes and  
204 autophagy regulators. We constructed gene networks that included the ammonia  
205 production genes identified by the pathway analysis, along with the autophagy  
206 markers LC3A/B and ATG16L1 that we identified in our western blots to be  
207 activated upon TGF- $\beta$  treatment. Although we found few gene-gene interactions  
208 among amine metabolism genes alone (**Figure 5B**), when we added the  
209 autophagy regulator ATG16L1 to this network, it connected the entire set of  
210 previously-isolated amine metabolism sub-networks (**Figure 5C**). LC3A/B was a  
211 node in the ATG16L1 network (**Supplementary File 4**). Our results suggest that  
212 TGF- $\beta$ -mediated EMT is associated with increased amine production and  
213 upregulation of autophagy. It remains to be tested in this system if the ammonia  
214 production induces autophagy, as has been demonstrated previously in both  
215 yeast and mouse embryonic fibroblasts [34], or if TGF- $\beta$ -induced autophagy  
216 upregulation leads to more ammonia. However, our results demonstrate a  
217 connection between TGF- $\beta$ -mediated EMT, altered amine production, and  
218 upregulation of autophagy.

219

#### 220 *Autophagy inhibition re-sensitizes cells to TGF- $\beta$ -induced chemoresistance*

221 Our data revealed that TGF- $\beta$ -induced EMT leads to ammonia production and  
222 upregulation of autophagy. Interestingly, both EMT and autophagy are known to be  
223 involved in chemoresistance. EMT can drive chemoresistance in multiple cancers [35-  
224 38]. Likewise, autophagy is a pro-survival mechanism in response to cellular stresses,

225 such as hypoxia and nutrient deprivation, and is increasingly implicated in resistance to  
226 cancer treatments [39, 40]. Integrating our observations with these reports, we  
227 hypothesized that EMT-induced drug resistance is mediated, at least in part, by elevated  
228 autophagy.

229 To test this hypothesis, we used high-throughput drug screens of 119 FDA-  
230 approved small-molecule anti-cancer agents. To do this, we first tested if TGF- $\beta$ -  
231 mediated EMT led to chemoresistance. We screened A549 cells treated with either  
232 vehicle or TGF- $\beta$  and plated at both low and high density. After 72 hours of incubation  
233 with each drug, the overall cell viability was analyzed with CellTiterGlo. We first  
234 performed quality control analyses of the screens. Linear regression of the empty wells  
235 and DMSO-treated wells showed virtually no relationship between the CellTiterGlo  
236 value and the position on the plate when comparing the same plate setup across  
237 multiple plates ( $R^2 = 0.0862$ ), suggesting that the screen results did not suffer from  
238 plate effects (**Supplementary Figure 1**). In contrast, the correlation coefficients in  
239 drug-containing wells were greater than 0.8 between high and low cell density for both  
240 vehicle- and TGF- $\beta$ -treated conditions, suggesting high reproducibility across replicate  
241 plates, when drug is present in the well (**Supplementary Figure 1**).

242 Given the lack of apparent plate effects and strong reproducibility between  
243 replicate screens, we investigated whether TGF- $\beta$  induced chemoresistance. Consistent  
244 with our hypothesis, TGF- $\beta$  treatment increased resistance to 60% (71/119) of the  
245 compounds tested, as evaluated by an increase in CellTiterGlo absorbance as compared  
246 to vehicle-treated control wells (**Figure 6A**). Analysis of these compounds by pathway  
247 targets showed that TGF- $\beta$  induced resistance to both broad spectrum chemotherapies,  
248 such as microtubule-targeting agents and topoisomerase inhibitors, as well as multiple  
249 targeted therapies, including those against HER2 and EGFR (**Figure 6B**).

250           Next, to investigate the importance of autophagy in promoting TGF- $\beta$ -induced  
251 therapy resistance, we performed siRNA-mediated knockdown of ATG16L1, the  
252 autophagy marker we identified as upregulated in TGF- $\beta$  treated cells. We first tested  
253 knockdown efficiency using four independent siRNAs and selected by western blot  
254 analysis siRNA\_1 for subsequent drug screens (**Figure 6C**). We then screened A549  
255 with the same 119 drugs +/- TGF- $\beta$  and treated with either a non-silencing siRNA or  
256 siRNA\_1 targeting ATG16L1. Remarkably, ATG16L1 knockdown re-sensitized cells to  
257 29/71 (41%) of drugs for which TGF- $\beta$  treatment led to increased resistance (**Figure**  
258 **6D**). Interestingly, these drugs included current standard of care therapies for small-cell  
259 lung cancer (SCLC), doxorubicin and topotecan, as well as anti-VEGFR therapies,  
260 regorafenib and axitinib, both of which have shown promising clinical benefits in early  
261 stage clinical trials against advanced non-small-cell lung cancer (NSCLC) [41, 42], and  
262 cabozantinib, a tyrosine kinase inhibitor that has shown efficacy along or in  
263 combination with erlotinib in treatment of EGFR wild-type NSCLC patients [43].  
264 Analysis by pathways showed that autophagy inhibition on average re-sensitized cells  
265 to multiple targeted therapies, including c-MET, c-RET, FLT3, TAM2, and dihydrofolate  
266 reductase (DHFR) (**Figure 6E**). Together, our results support the hypothesis that TGF-  
267  $\beta$ -mediated therapy resistance is driven, in part, by autophagy, suggesting the potential  
268 use of autophagy inhibitors as a concurrent or adjuvant therapy to counter resistance.

269           To determine if ATG16L1 was related to clinical outcomes, we analyzed  
270 ATG16L1 expression in gene expression data sets from patient tumors. Analysis of  
271 Kaplan Meier curves showed that low ATG16L1 expression is prognostic for improved  
272 overall survival in patients with lung and clear cell renal cancer (**Figure 7A-C**) and  
273 improved relapse-free survival in patients with colorectal cancer (**Figure 7D**). It is also  
274 worth noting that high ATG16L1 was prognostic for improved disease-free survival in

275 breast cancer (**Figure 7E**). However, despite the opposite trend in breast cancer, these  
276 analyses indicate ATG16L1 as an important prognostic marker of clinical response and  
277 cancer cell aggression.

278

## 279 **Discussion**

280 The progression of cancer from an indolent, slow-growing primary tumor  
281 to metastatic and therapy resistant disease is, at its foundation, an evolutionary  
282 process. Genetic and genomic dysregulation promotes heterogeneity in tumor cell  
283 populations [44], which provides raw materials for selection of the fittest cancer  
284 cells. During this process, mutations [45], epigenetic alterations [46], and gene  
285 expression changes [47] are selected that enable survival of individual cancer  
286 cells under the diverse environmental pressures not only within the tumor, but  
287 also during metastatic progression [48, 49] and the emergence of therapy  
288 resistance [50].

289 Here, we combined methods rooted in evolutionary theory, such as  
290 phylogenetic inference, with pathway and network analyses, as well as  
291 experimental techniques, to yield new insights. By taking this novel approach to  
292 analyze a well-established system—TGF- $\beta$ -induced EMT—we identified  
293 mechanisms of therapy resistance. Specifically, we found that EMT leads to  
294 increased production of intracellular ammonia. Ammonia is a by-product of  
295 protein breakdown and serves an important function in maintaining homeostasis  
296 in electrolyte concentration [51]. Recent evidence, however, also suggests that  
297 ammonia production is involved in regulating autophagy and pro-survival circuits  
298 that contribute to chemoresistance [34, 52]. Importantly, autophagy can lead to  
299 increased aggressiveness in cancer, perhaps as an adaptive response to cellular

300 stress. In our present study, downregulation of autophagy partially reversed  
301 EMT-induced therapy resistance, suggesting the potential benefits of concurrent  
302 uses of autophagy inhibitors with standard-of-care therapies.

303 TGF- $\beta$  has also been reported to induce metabolic reprogramming of  
304 stromal cells such as cancer-associated fibroblasts (CAFs), where CAFs  
305 overexpressing TGF- $\beta$  ligands show increased autophagy and HIF-1 $\alpha$  activation,  
306 and concomitant reduced oxidative phosphorylation [53]. The  
307 scaffolding/regulatory protein caveolin-1 – a functional regulator of TGF- $\beta$   
308 signaling – can play a key role in coordinating these responses [54, 55]. Thus, the  
309 nexus of TGF- $\beta$  signaling, increased autophagy, and metabolic reprogramming  
310 may be a common design principle of multiple cell types.

311 Interestingly, inhibition of autophagy consistently led to re-sensitization to  
312 c-Met inhibitors during EMT. The c-Met oncogene is one of the two most highly  
313 mutated tyrosine kinase receptors in NSCLC, and resistance to tyrosine kinase  
314 inhibitors (TKI) invariably follows after treatment [56]. Indeed, resistance to  
315 erlotinib is common in lung cancer, and ATG16L1 knockdown re-sensitized cells  
316 to increased EMT-induced erlotinib resistance. EMT has been shown as an  
317 important contributor to this resistance as TKI resistance NSCLC cell lines has a  
318 more mesenchymal phenotype, higher expression of mesenchymal markers such  
319 as Zeb-1 and vimentin, and downregulation of E-cadherin [57]. Recent evidence  
320 has shown that c-Met promotes anoikis-resistance and cell growth via activation  
321 of autophagy regulators, such as ATG5 and Beclin-1 [58]. These observations  
322 suggest that autophagy may be an important resistance mechanism and a  
323 combinatorial use of autophagy inhibitors with TKIs may increase therapeutic  
324 efficacy of TKIs and possibly prolong or reverse resistance.

325

## 326 **Materials and Methods**

### 327 *Cell Culture*

328 All cell lines were obtained from the Duke Cell Culture Facility. The Duke  
329 Cell Culture Facility routinely tests for mycoplasma and performs cell line  
330 authentication by short tandem repeat analysis. Cells were cultured in Dulbecco's  
331 Modified Eagle Medium (DMEM) with fetal bovine serum (FBS) and 1%  
332 penicillin-streptomycin in a standard 37 °C tissue culture incubator with 5% CO<sub>2</sub>.

333

### 334 *RNA extraction, reverse transcription, and RT-qPCR*

335 RNA extraction, reverse transcription, and RT-qPCR were performed as  
336 previously described [59].

337

### 338 *Western blotting*

339 Cells were prepared and lysed in 1x radio-immunoprecipitation assay  
340 (RIPA) buffer mixed with 1x protease and phosphatase inhibitor cocktail (Roche).  
341 Cell lysates were incubated at 4°C for 20 minutes and centrifuged at 14,000 x g  
342 for 5 minutes. Cleared lysates were mixed with 4x Laemmli loading buffer and  
343 incubated at 95°C for 3 minutes. Lysates were separated in 4–12% NuPAGE  
344 Novex Bis-Tris gels (ThermoFisher). Proteins were transferred to nitrocellulose  
345 membrane (GE Healthcare Life Sciences) in 1x NuPAGE Transfer Buffer  
346 (ThermoFisher) for 2 hours at 75V at 4°C in the cold room. Membranes were  
347 blocked at room temperature using Starting Block T20 TBS Blocking Buffer  
348 (ThermoFisher). Primary antibodies were added to the blocking buffer and  
349 incubated at 4°C overnight. Membranes were washed two times for 5 minutes

350 each with phosphate buffered saline (PBS) and incubated with Licor goat anti-  
351 mouse or goat anti-rabbit secondary antibodies diluted 1:20,000 in Starting Block  
352 buffer. Membranes were visualized using the Odyssey Fc imager (27402864).  
353 Primary antibodies used included GAPDH (C2415, Santa Cruz Biotechology),  
354 ATG16L1 (8089T, Cell Signaling) and LC3 A/B (12741T, Cell Signaling) at 1:1000.

355

### 356 *Ammonia Production Assay*

357 A total of 200,000 cells were seeded in 6-cm dishes. At each time point,  
358 cells were washed with PBS, scraped, and lysed in Ammonia Assay Buffer  
359 provided in the Abcam ammonia assay kit (ab83360) after the end of each  
360 treatment time point. Ammonia production assays were performed after  
361 collecting all time points using the protocol recommended by the manufacturer.

362

### 363 *Cytoscape analysis*

364 Gene networks were analyzed by importing all available human data on  
365 each gene in the Universal Interaction Database Client using Cytoscape version  
366 3.5.1. All relevant networks of genes were merged to visualize interactions among  
367 genes. The Cytoscape files used to construct the networks are provided as merged  
368 networks 5 and 6 in Supplementary File 4.

369

### 370 *Phylogenetic reconstructions from gene expression data*

371 Distance-based dendrogram analyses were performed by constructing a  
372 distance matrix calculated based on the entire microarray data set for each data  
373 set to be analyzed, using the genes as the characters, the raw expression value for  
374 each gene as the character states, and the samples as the taxa. The Neighbor

375 Joining method [60] was used for reconstructing phylogeny with distance  
376 matrices. To perform analysis based on maximum-likelihood (ML) and  
377 parsimony, the continuous gene expression data was converted into categorical  
378 variables. For example, for GSE23038, we used the passage 0 sample as an  
379 'outgroup', and converted the gene expression data for all other samples into  
380 either up-regulated, down-regulated, or constant relative to passage 0. The  
381 reliability of the parsimony method is generally considered to increase with an  
382 increasing number of informative characters [61-63]. Therefore, cut-off  
383 thresholds of up- and down-regulation were determined by calculating the  
384 maximum number of informative sites given different cut-offs, and a threshold  
385 was selected that provided the highest number of informative sites in each data  
386 set. ML and parsimony analyses were then performed based on converted data.  
387 ML analysis after data conversion was performed online on a free phylogeny  
388 platform PhyML 3.0 (14) whereas distance and parsimony tree constructions  
389 were performed using the APE [64] and Phangorn [65] packages implemented in  
390 R (15). Bootstrap tests of 100 pseudo-replicates were performed for all  
391 phylogenies to assess the branch support. Tree files were visualized in FigTree  
392 (Andrew Rambaut; <http://tree.bio.ed.ac.uk/software/figtree/>).

393

#### 394 *High-throughput screening*

395 A549 cells were screened with the NCI Approved Oncology Drugs Set VI in the  
396 presence of vehicle (4 mM HCl and 2% BSA) or 4 ng/mL recombinant human  
397 TGF- $\beta$  (R&D Systems). Briefly, A549 cells were dispensed using liquid handling  
398 into 384 well plates with no drug, DMSO, or 1  $\mu$ M drug at cell plating densities of  
399 250 and 1000 cells/well. Plates were incubated at 37°C, and cell viability was



400 assayed by CellTiterGlo after 72 hours. Relative drug resistance or sensitivity was  
401 calculated as the fold change difference in CellTiterGlo value between vehicle-  
402 treated and TGF- $\beta$ -treated wells. To perform the screen in the context of  
403 ATG16L1 knockdown, 20 nM siRNA targeting ATG16L1 was delivered to A549  
404 cells by reverse transfection using RNAiMax and incubated at 37°C for 24 hours.  
405 After 24 hours, the drug screen was performed +/- TGF- $\beta$  as described above.  
406 All screens were performed in the Duke Functional Genomics Shared Resource.

407

#### 408 *Correlation of ATG16L1 with clinical outcomes*

409 Kaplan Meier curves were generated based on patients stratified by ATG16L1  
410 expression level using R2: Genomics Analysis and Visualization Platform  
411 (<https://hgserver1.amc.nl/cgi-bin/r2/main.cgi>) and GEPIA ([http://gepia.cancer-  
412 pku.cn/](http://gepia.cancer-pku.cn/)). The scan option was used to automatically select the cut-off values in  
413 the R2 platform, and default settings were used for GEPIA.

414

415

#### 416 **Acknowledgements**

417 JAS wishes to acknowledge support from Meg and Bill Lindenberger, the Paul and  
418 Shirley Friedland Fund, the Triangle Center for Evolutionary Medicine, and funds  
419 raised in memory of Muriel E. Rudershausen ([riding4research.org](http://riding4research.org)). The authors  
420 wish to thank Dr. Jeffrey Townsend and Dr. Herbert Levine for many helpful  
421 discussions in preparation of the manuscript. MKJ is supported by a training  
422 fellowship from the Gulf Coast Consortia on Computational Cancer Biology  
423 Training Program (CPRIT Grant No. RP170593).

424

425 **Figure Legends**

426

427 **Figure 1. An integrated framework of iterative systems-level analysis and**  
428 **experimental validation provides new insights.** Large amounts of raw data,  
429 generated by new experimentation or re-analyzed from public databases (1), are  
430 analyzed by clustering approaches to easily visualize data topology (2). This  
431 visualization fosters new, deeper understanding that informs a new hypothesis  
432 (3). Experimental validation of the new hypothesis generates new data (4), which  
433 is analyzed and visualized as a system (5).

434

435 **Figure 2. Phylogenetic reconstruction provides a simple visualization tool**  
436 **to view temporal changes in gene expression data. A.** Distance-based  
437 phylogeny of GSE23038; serial passage of normal prostate cells immortalized  
438 with hTERT using gene expression data as a continuous variable. **B.** Maximum-  
439 likelihood and **C.** Maximum parsimony trees constructed based on gene  
440 expression data transformed to categorical variables. **D.** Single and **E.** Complete  
441 linkage hierarchical clustering provides similar groupings of passage numbers,  
442 but lacks the temporal structure.

443

444 **Figure 3. Phylogenetic clustering enables reconstruction of longitudinal data**  
445 **based on gene expression. A.** Distance, maximum parsimony, and maximum-  
446 likelihood dendograms of GSE17708; microarray analysis of A549 cells treated with  
447 TGF- $\beta$  over 72 hours. **B.** Distance, maximum parsimony, and maximum-likelihood  
448 phylogeny construction of GSE12548; TGF- $\beta$  and TNF- $\alpha$  treatment of human retinal  
449 pigment epithelium cells over 60 hours.

450

451 **Figure 4. Visualization of tree topology reveals altered metabolism during**

452 **epithelial-mesenchymal transition (EMT). A.** The topology of the maximum-

453 likelihood reconstruction of GSE17708 showed an admixed clade at early time points in

454 A549 cells with TGF- $\beta$  treatment, with a clearly resolved clade of later time points after

455 eight hours as phenotypic signal switched from epithelial to mesenchymal. **B.**

456 Consistent with the tree topology, changes in EMT biomarkers E-cadherin and vimentin

457 were not apparent until after eight hours of treatment. **C.** Growth curves of A549 cells

458 treated with vehicle (blue circles) or TGF- $\beta$  (red x) analyzed by IncuCyte time lapse

459 imaging revealed TGF- $\beta$ -induced growth inhibition by 48-72 hours. **D.** Pathway analysis

460 of genes contributing to the bifurcation of early (<8 hours) and late ( $\geq$ 8 hours) time

461 point clades revealed TGF- $\beta$ -induced changes in amine metabolism pathways at the

462 later time points as compared to the early time points. **E.** Ammonia production assays

463 validated the prediction that TGF- $\beta$  induces up-regulation of ammonia production.

464

465 **Figure 5. Epithelial-mesenchymal transition induces activation of autophagy and**

466 **links to an amine production gene network. A.** TGF- $\beta$ -induced epithelial-

467 mesenchymal transition led to up-regulation of autophagy markers ATG16L1 and

468 MAP1LC3A (LC3A/B). **B.** Cytoscape networks of amine production genes identified in

469 Figure 4 showed few interactions between sub-networks. **C.** Addition of the autophagy

470 regulator, ATG16L1 (yellow circle), acted as a central hub to connect all amine

471 metabolism sub-networks.

472

473 **Figure 6. ATG16L1 knockdown rescues TGF- $\beta$ -mediated chemo-resistance. A. A**

474 screen of 119 FDA-approved small molecule inhibitors demonstrated a broad increase

475 in chemoresistance following TGF- $\beta$  treatment. Each black dot represents one  
476 compound. Dots above the 1 were differentially resistant in TGF- $\beta$ -treated cells as  
477 compared to vehicle-treated cells; dots below the 1 were more sensitive in the TGF- $\beta$ -  
478 treated cells as compared to vehicle treated cells. **B.** Analysis of drug screen data by  
479 targets and pathways identified increased TGF- $\beta$ -mediated resistance to several  
480 common chemotherapies, such as microtubule-associated and topoisomerase inhibitor  
481 therapies, and targeted therapies in lung cancer treatment, such as c-MET, VEGF, and  
482 EGFR (purple bars). **C.** Knockdown of ATG16L1 by siRNAs was validated by western  
483 blotting. siCtrl = non-silencing siRNA; si\_1, si\_2, si\_4, si\_5 are independent siRNAs  
484 targeting ATG16L1. **D.** A549 lung adenocarcinoma cells -/+ TGF- $\beta$  and -/+ siATG16\_1  
485 were screened against 119 FDA-approved compounds to identify drugs for which  
486 ATG16L1 rescued TGF- $\beta$ -mediated therapy resistance. ATG16L1 knockdown re-  
487 sensitized cells to multiple therapeutic agents. **E.** Pathway level analysis of compounds  
488 where TGF- $\beta$ -mediated resistance was rescued by ATG16L1 knockdown.

489

490 **Figure 7. ATG16L1 is a prognostic biomarker of survival and progression in**  
491 **carcinoma patients. A.** Low ATG16L1 expression is prognostic for improved overall  
492 survival in lung adenocarcinoma patients. **B.** Low ATG16L1 expression significantly  
493 predicts improved overall survival in kidney renal clear cell carcinoma patients. **C.**  
494 Lower ATG16L1 expression in lung adenocarcinoma from The Cancer Genome Atlas  
495 data set is prognostic for improved overall survival; data analyzed using GEPIA -  
496 <http://gepia.cancer-pku.cn/>. **D.** Low ATG16L1 expression trends with better relapse-  
497 free survival in colorectal carcinoma patients. **E.** High levels of ATG16L1 are ATG16L1 is  
498 prognostic of increased disease-free survival in breast cancer patients.

499

## 500 References

501

- 502 1. Chaiwanon, J., et al., *Information Integration and Communication in Plant Growth*  
503 *Regulation*. Cell, 2016. **164**(6): p. 1257-1268.
- 504 2. Pawson, C.T. and J.D. Scott, *Signal integration through blending, bolstering and*  
505 *bifurcating of intracellular information*. Nat Struct Mol Biol, 2010. **17**(6): p. 653-  
506 8.
- 507 3. Hanahan, D. and R.A. Weinberg, *Hallmarks of cancer: the next generation*. Cell,  
508 2011. **144**(5): p. 646-74.
- 509 4. Janda, E., et al., *Oncogenic Ras/Her-2 mediate hyperproliferation of polarized*  
510 *epithelial cells in 3D cultures and rapid tumor growth via the PI3K pathway*.  
511 *Oncogene*, 2002. **21**(33): p. 5148-59.
- 512 5. Sever, R. and J.S. Brugge, *Signal transduction in cancer*. Cold Spring Harb Perspect  
513 *Med*, 2015. **5**(4).
- 514 6. van Golen, K.L., et al., *Mitogen activated protein kinase pathway is involved in*  
515 *RhoC GTPase induced motility, invasion and angiogenesis in inflammatory breast*  
516 *cancer*. Clin Exp Metastasis, 2002. **19**(4): p. 301-11.
- 517 7. Iqbal, W., et al., *Targeting signal transduction pathways of cancer stem cells for*  
518 *therapeutic opportunities of metastasis*. Oncotarget, 2016. **7**(46): p. 76337-76353.
- 519 8. Janda, E., et al., *Ras and TGF[beta] cooperatively regulate epithelial cell plasticity*  
520 *and metastasis: dissection of Ras signaling pathways*. J Cell Biol, 2002. **156**(2): p.  
521 299-313.
- 522 9. Brown, W.S., et al., *Covalent Targeting of Fibroblast Growth Factor Receptor*  
523 *Inhibits Metastatic Breast Cancer*. Mol Cancer Ther, 2016. **15**(9): p. 2096-106.
- 524 10. Kitisin, K., et al., *Tgf-Beta signaling in development*. Sci STKE, 2007. **2007**(399): p.  
525 cm1.
- 526 11. Walton, K.L., K.E. Johnson, and C.A. Harrison, *Targeting TGF-beta Mediated SMAD*  
527 *Signaling for the Prevention of Fibrosis*. Front Pharmacol, 2017. **8**: p. 461.
- 528 12. Carthy, J.M., *TGFbeta signaling and the control of myofibroblast differentiation:*  
529 *Implications for chronic inflammatory disorders*. J Cell Physiol, 2018. **233**(1): p.  
530 98-106.
- 531 13. Nawshad, A., et al., *Transforming growth factor-beta signaling during epithelial-*  
532 *mesenchymal transformation: implications for embryogenesis and tumor*  
533 *metastasis*. Cells Tissues Organs, 2005. **179**(1-2): p. 11-23.
- 534 14. Papageorgis, P., *TGFbeta Signaling in Tumor Initiation, Epithelial-to-Mesenchymal*  
535 *Transition, and Metastasis*. J Oncol, 2015. **2015**: p. 587193.
- 536 15. Fuxe, J., T. Vincent, and A. Garcia de Herreros, *Transcriptional crosstalk between*  
537 *TGF-beta and stem cell pathways in tumor cell invasion: role of EMT promoting*  
538 *Smad complexes*. Cell Cycle, 2010. **9**(12): p. 2363-74.
- 539 16. Huang, S.S. and J.S. Huang, *TGF-beta control of cell proliferation*. J Cell Biochem,  
540 2005. **96**(3): p. 447-62.
- 541 17. Moustakas, A., et al., *Mechanisms of TGF-beta signaling in regulation of cell growth*  
542 *and differentiation*. Immunol Lett, 2002. **82**(1-2): p. 85-91.
- 543 18. Jiang, L., et al., *Metabolic reprogramming during TGFbeta1-induced epithelial-to-*  
544 *mesenchymal transition*. Oncogene, 2015. **34**(30): p. 3908-16.

- 545 19. Kiyono, K., et al., *Autophagy is activated by TGF-beta and potentiates TGF-beta-*  
546 *mediated growth inhibition in human hepatocellular carcinoma cells.* Cancer Res,  
547 2009. **69**(23): p. 8844-52.
- 548 20. Hazelbag, S., et al., *Transforming growth factor-beta1 induces tumor stroma and*  
549 *reduces tumor infiltrate in cervical cancer.* Hum Pathol, 2002. **33**(12): p. 1193-9.
- 550 21. Gigante, M., L. Gesualdo, and E. Ranieri, *TGF-beta: a master switch in tumor*  
551 *immunity.* Curr Pharm Des, 2012. **18**(27): p. 4126-34.
- 552 22. Yao, Z., et al., *TGF-beta IL-6 axis mediates selective and adaptive mechanisms of*  
553 *resistance to molecular targeted therapy in lung cancer.* Proc Natl Acad Sci U S A,  
554 2010. **107**(35): p. 15535-40.
- 555 23. Brunen, D., et al., *TGF-beta: an emerging player in drug resistance.* Cell Cycle,  
556 2013. **12**(18): p. 2960-8.
- 557 24. Magi, S., Iwamoto, K., and Okada-Hatakeyama, *Current status of mathematical*  
558 *modeling of cancer – From the viewpoint of cancer hallmarks.* Current Opinion in  
559 Systems Biology, 2017. **2**: p. 39-48.
- 560 25. Anderson, A.R. and V. Quaranta, *Integrative mathematical oncology.* Nat Rev  
561 Cancer, 2008. **8**(3): p. 227-34.
- 562 26. Gerlinger, M., et al., *Cancer: evolution within a lifetime.* Annu Rev Genet, 2014. **48**:  
563 p. 215-36.
- 564 27. Maley, C.C., et al., *Classifying the evolutionary and ecological features of neoplasms.*  
565 Nat Rev Cancer, 2017. **17**(10): p. 605-619.
- 566 28. Somarelli, J.A., et al., *PhyloOncology: Understanding cancer through phylogenetic*  
567 *analysis.* Biochim Biophys Acta, 2017. **1867**(2): p. 101-108.
- 568 29. Kogan-Sakin, I., et al., *Mutant p53(R175H) upregulates Twist1 expression and*  
569 *promotes epithelial-mesenchymal transition in immortalized prostate cells.* Cell  
570 Death Differ, 2011. **18**(2): p. 271-81.
- 571 30. Sartor, M.A., et al., *ConceptGen: a gene set enrichment and gene set relation*  
572 *mapping tool.* Bioinformatics, 2010. **26**(4): p. 456-63.
- 573 31. Takahashi, E., et al., *Tumor necrosis factor-alpha regulates transforming growth*  
574 *factor-beta-dependent epithelial-mesenchymal transition by promoting*  
575 *hyaluronan-CD44-moesin interaction.* J Biol Chem, 2010. **285**(6): p. 4060-73.
- 576 32. Lovisa, S., et al., *Epithelial-to-mesenchymal transition induces cell cycle arrest and*  
577 *parenchymal damage in renal fibrosis.* Nat Med, 2015. **21**(9): p. 998-1009.
- 578 33. Vega, S., et al., *Snail blocks the cell cycle and confers resistance to cell death.* Genes  
579 Dev, 2004. **18**(10): p. 1131-43.
- 580 34. Cheong, H., T. Lindsten, and C.B. Thompson, *Autophagy and ammonia.* Autophagy,  
581 2012. **8**(1): p. 122-3.
- 582 35. Du, B. and J.S. Shim, *Targeting Epithelial-Mesenchymal Transition (EMT) to*  
583 *Overcome Drug Resistance in Cancer.* Molecules, 2016. **21**(7).
- 584 36. Singh, A. and J. Settleman, *EMT, cancer stem cells and drug resistance: an*  
585 *emerging axis of evil in the war on cancer.* Oncogene, 2010. **29**(34): p. 4741-51.
- 586 37. Fischer, K.R., et al., *Epithelial-to-mesenchymal transition is not required for lung*  
587 *metastasis but contributes to chemoresistance.* Nature, 2015. **527**(7579): p. 472-  
588 6.
- 589 38. Zheng, X., et al., *Epithelial-to-mesenchymal transition is dispensable for metastasis*  
590 *but induces chemoresistance in pancreatic cancer.* Nature, 2015. **527**(7579): p.  
591 525-30.
- 592 39. Sui, X., et al., *Autophagy and chemotherapy resistance: a promising therapeutic*  
593 *target for cancer treatment.* Cell Death Dis, 2013. **4**: p. e838.



- 594 40. Yang, Z.J., et al., *The role of autophagy in cancer: therapeutic implications*. Mol  
595 Cancer Ther, 2011. **10**(9): p. 1533-41.
- 596 41. Schiller, J.H., et al., *Efficacy and safety of axitinib in patients with advanced non-*  
597 *small-cell lung cancer: results from a phase II study*. J Clin Oncol, 2009. **27**(23): p.  
598 3836-41.
- 599 42. Mross, K., et al., *A phase I dose-escalation study of regorafenib (BAY 73-4506), an*  
600 *inhibitor of oncogenic, angiogenic, and stromal kinases, in patients with advanced*  
601 *solid tumors*. Clin Cancer Res, 2012. **18**(9): p. 2658-67.
- 602 43. Neal, J.W., et al., *Erlotinib, cabozantinib, or erlotinib plus cabozantinib as second-*  
603 *line or third-line treatment of patients with EGFR wild-type advanced non-small-*  
604 *cell lung cancer (ECOG-ACRIN 1512): a randomised, controlled, open-label,*  
605 *multicentre, phase 2 trial*. Lancet Oncol, 2016. **17**(12): p. 1661-1671.
- 606 44. Nowell, P.C., *The clonal evolution of tumor cell populations*. Science, 1976.  
607 **194**(4260): p. 23-8.
- 608 45. Lipinski, K.A., et al., *Cancer Evolution and the Limits of Predictability in Precision*  
609 *Cancer Medicine*. Trends Cancer, 2016. **2**(1): p. 49-63.
- 610 46. Feinberg, A.P., *Epigenetic stochasticity, nuclear structure and cancer: the*  
611 *implications for medicine*. J Intern Med, 2014. **276**(1): p. 5-11.
- 612 47. Ostrow, S.L., et al., *Cancer evolution is associated with pervasive positive selection*  
613 *on globally expressed genes*. PLoS Genet, 2014. **10**(3): p. e1004239.
- 614 48. Casasent, A.K., M. Edgerton, and N.E. Navin, *Genome evolution in ductal carcinoma*  
615 *in situ: invasion of the clones*. J Pathol, 2017. **241**(2): p. 208-218.
- 616 49. Seyfried, T.N. and L.C. Huysentruyt, *On the origin of cancer metastasis*. Crit Rev  
617 Oncog, 2013. **18**(1-2): p. 43-73.
- 618 50. Gatenby, R. and J. Brown, *The Evolution and Ecology of Resistance in Cancer*  
619 *Therapy*. Cold Spring Harb Perspect Med, 2018. **8**(3).
- 620 51. Kurtz, I., P.D. Dass, and S. Cramer, *The importance of renal ammonia metabolism*  
621 *to whole body acid-base balance: a reanalysis of the pathophysiology of renal*  
622 *tubular acidosis*. Miner Electrolyte Metab, 1990. **16**(5): p. 331-40.
- 623 52. Eng, C.H., et al., *Ammonia derived from glutaminolysis is a diffusible regulator of*  
624 *autophagy*. Sci Signal, 2010. **3**(119): p. ra31.
- 625 53. Guido, C., et al., *Metabolic reprogramming of cancer-associated fibroblasts by TGF-*  
626 *beta drives tumor growth: connecting TGF-beta signaling with "Warburg-like"*  
627 *cancer metabolism and L-lactate production*. Cell Cycle, 2012. **11**(16): p. 3019-35.
- 628 54. Razani, B., et al., *Caveolin-1 regulates transforming growth factor (TGF)-*  
629 *beta/SMAD signaling through an interaction with the TGF-beta type I receptor*. J  
630 Biol Chem, 2001. **276**(9): p. 6727-38.
- 631 55. Shiroto, T., et al., *Caveolin-1 is a critical determinant of autophagy, metabolic*  
632 *switching, and oxidative stress in vascular endothelium*. PLoS One, 2014. **9**(2): p.  
633 e87871.
- 634 56. Pasquini, G. and G. Giaccone, *C-MET inhibitors for advanced non-small cell lung*  
635 *cancer*. Expert Opin Investig Drugs, 2018. **27**(4): p. 363-375.
- 636 57. Rastogi, I., et al., *Mechanism of c-Met and EGFR tyrosine kinase inhibitor resistance*  
637 *through epithelial mesenchymal transition in non-small cell lung cancer*. Biochem  
638 Biophys Res Commun, 2016. **477**(4): p. 937-944.
- 639 58. Barrow-McGee, R., et al., *Beta 1-integrin-c-Met cooperation reveals an inside-in*  
640 *survival signalling on autophagy-related endomembranes*. Nat Commun, 2016. **7**:  
641 p. 11942.

- 642 59. Somarelli, J.A., et al., *Mesenchymal-Epithelial Transition in Sarcomas Is Controlled*  
643 *by the Combinatorial Expression of MicroRNA 200s and GRHL2*. *Mol Cell Biol*,  
644 2016. **36**(19): p. 2503-13.
- 645 60. Saitou, N. and M. Nei, *The neighbor-joining method: a new method for*  
646 *reconstructing phylogenetic trees*. *Mol Biol Evol*, 1987. **4**(4): p. 406-25.
- 647 61. Hillis, D.M., and James J. Bull *An empirical test of bootstrapping as a method for*  
648 *assessing confidence in phylogenetic analysis*. *Systematic biology* 1993. **42**(2): p.  
649 182-192.
- 650 62. Wiens, J.J., *Polymorphic characters in phylogenetic systematics*. *Systematic*  
651 *biology*, 1995. **44**(4): p. 482-500.
- 652 63. Hillis, D.M., J.P. Huelsenbeck, and C.W. Cunningham, *Application and accuracy of*  
653 *molecular phylogenies*. *Science*, 1994. **264**(5159): p. 671-7.
- 654 64. Paradis, E., J. Claude, and K. Strimmer, *APE: Analyses of Phylogenetics and*  
655 *Evolution in R language*. *Bioinformatics*, 2004. **20**(2): p. 289-90.
- 656 65. Schliep, K.P., *phangorn: phylogenetic analysis in R*. *Bioinformatics*, 2011. **27**(4): p.  
657 592-3.  
658



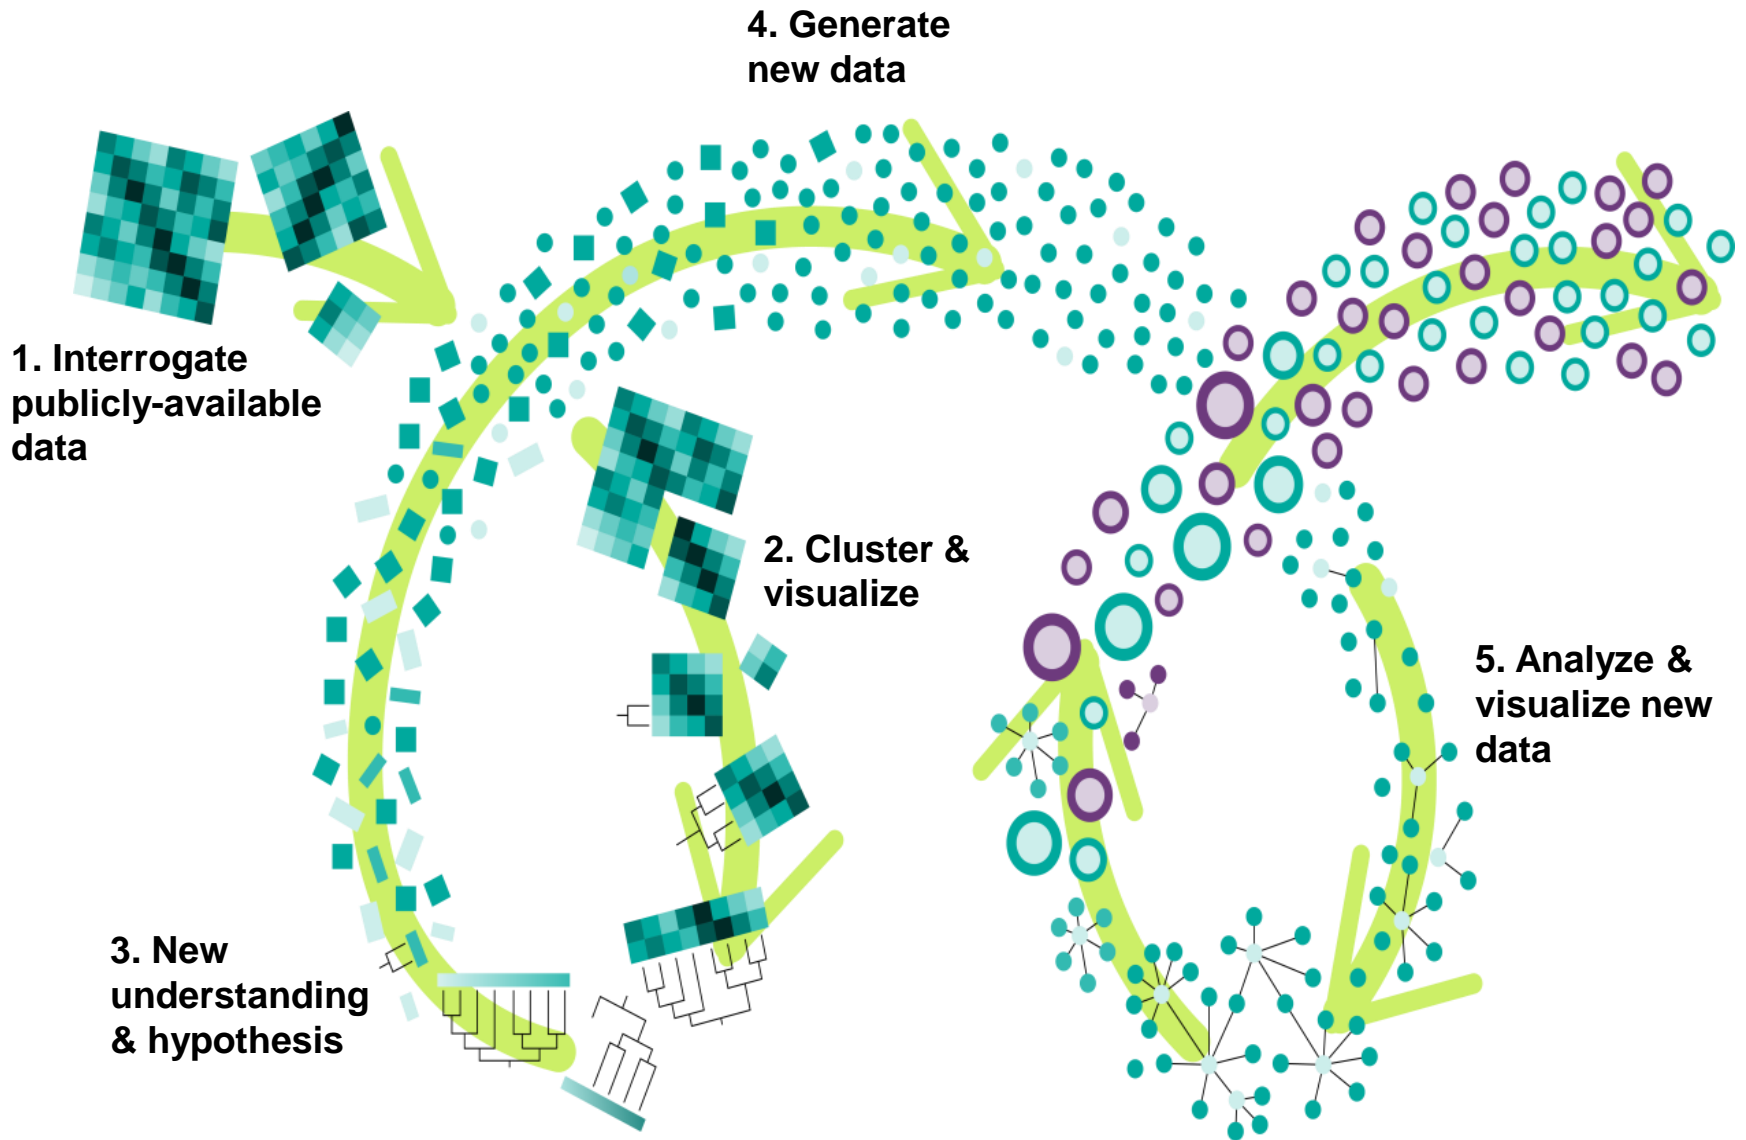

**A**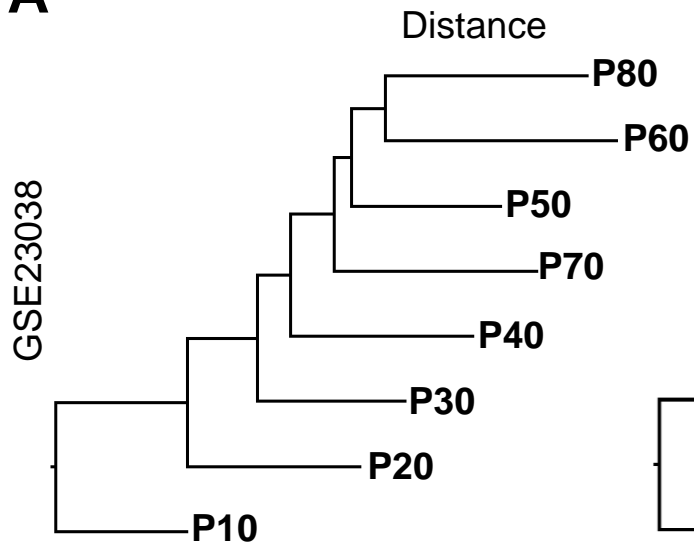**B**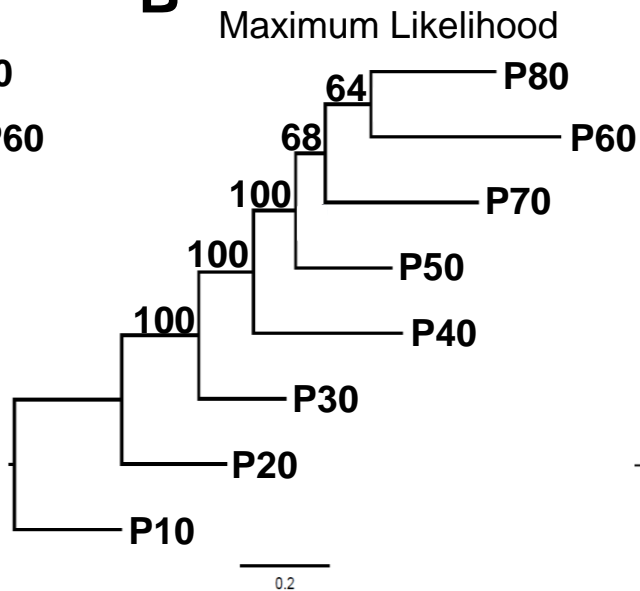**C**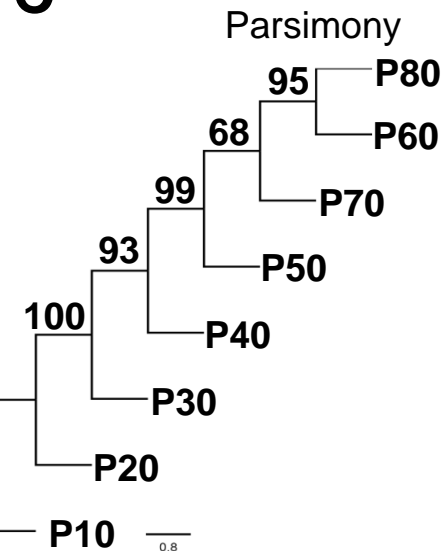**D**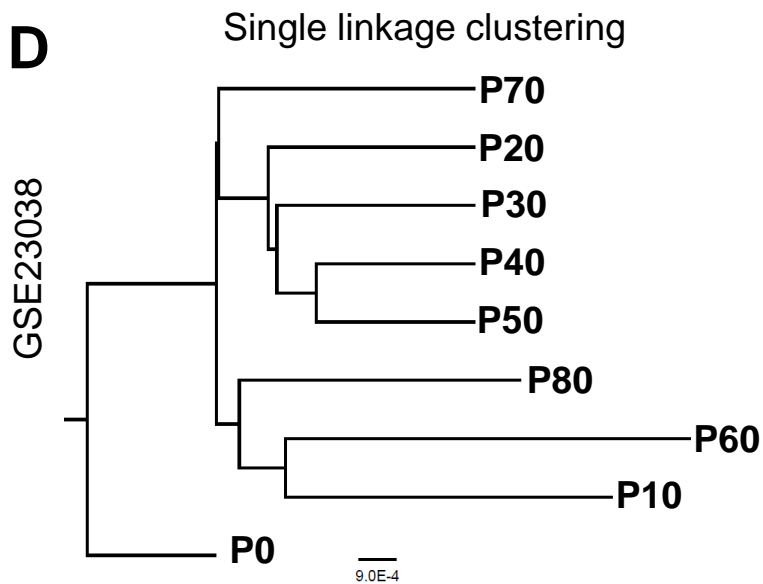**E**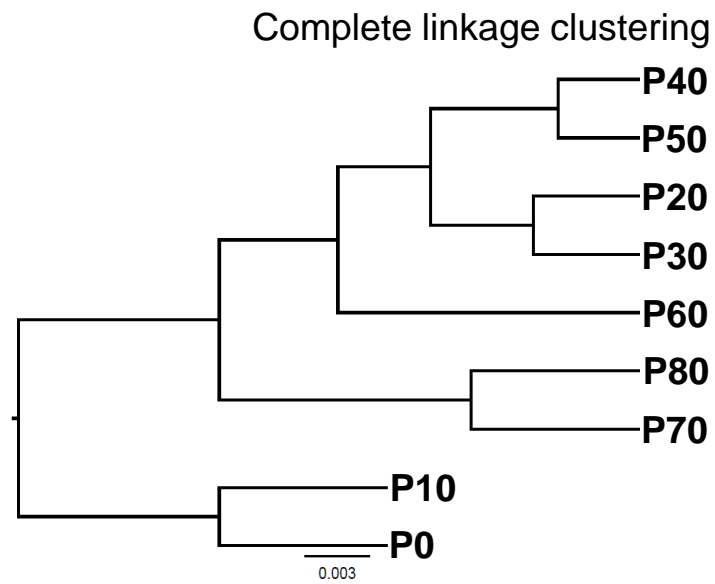

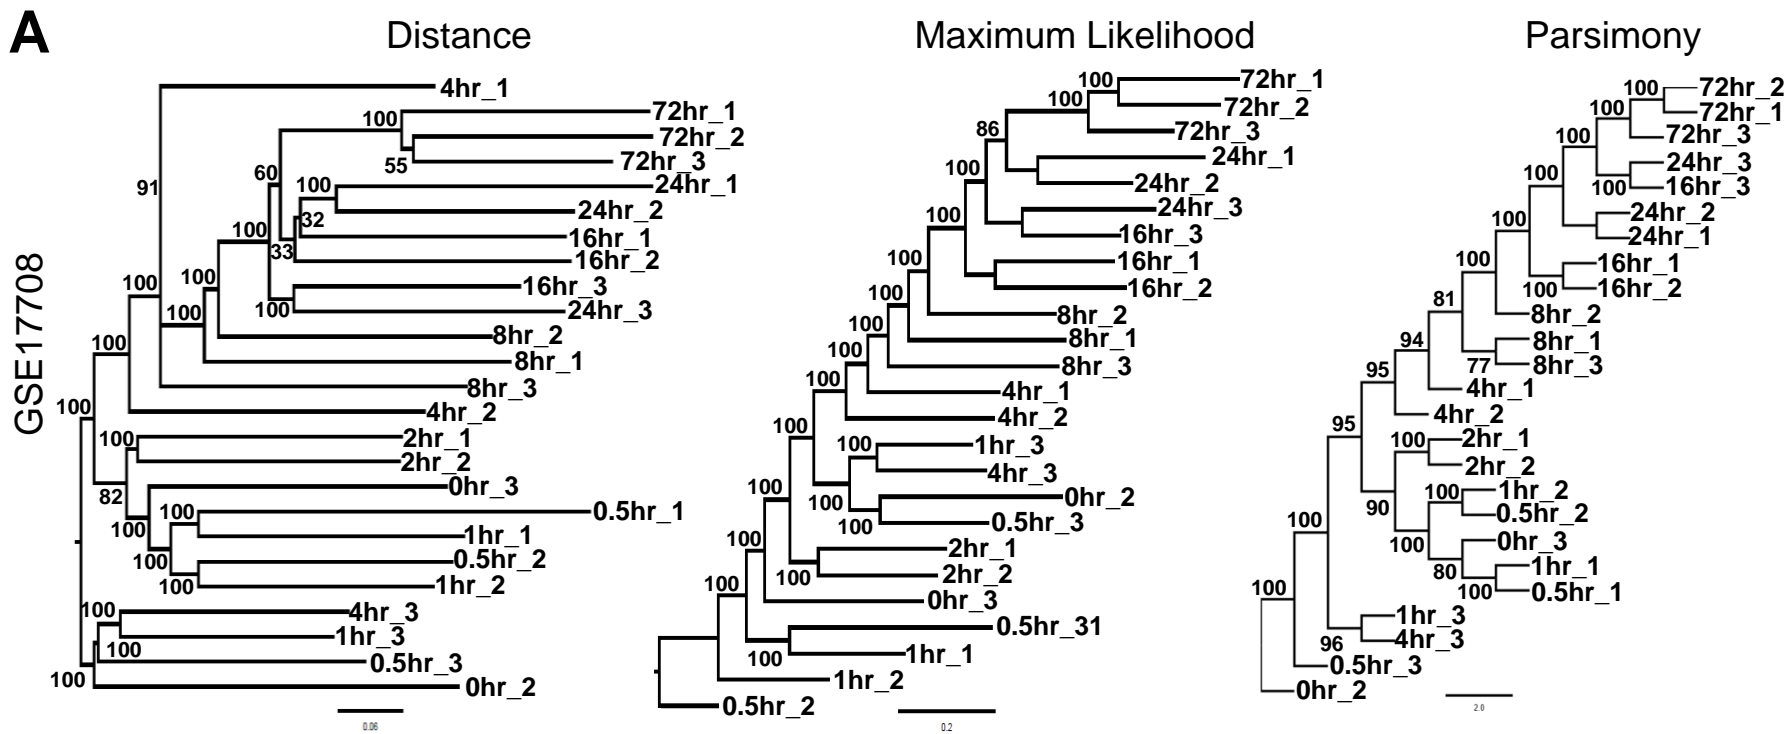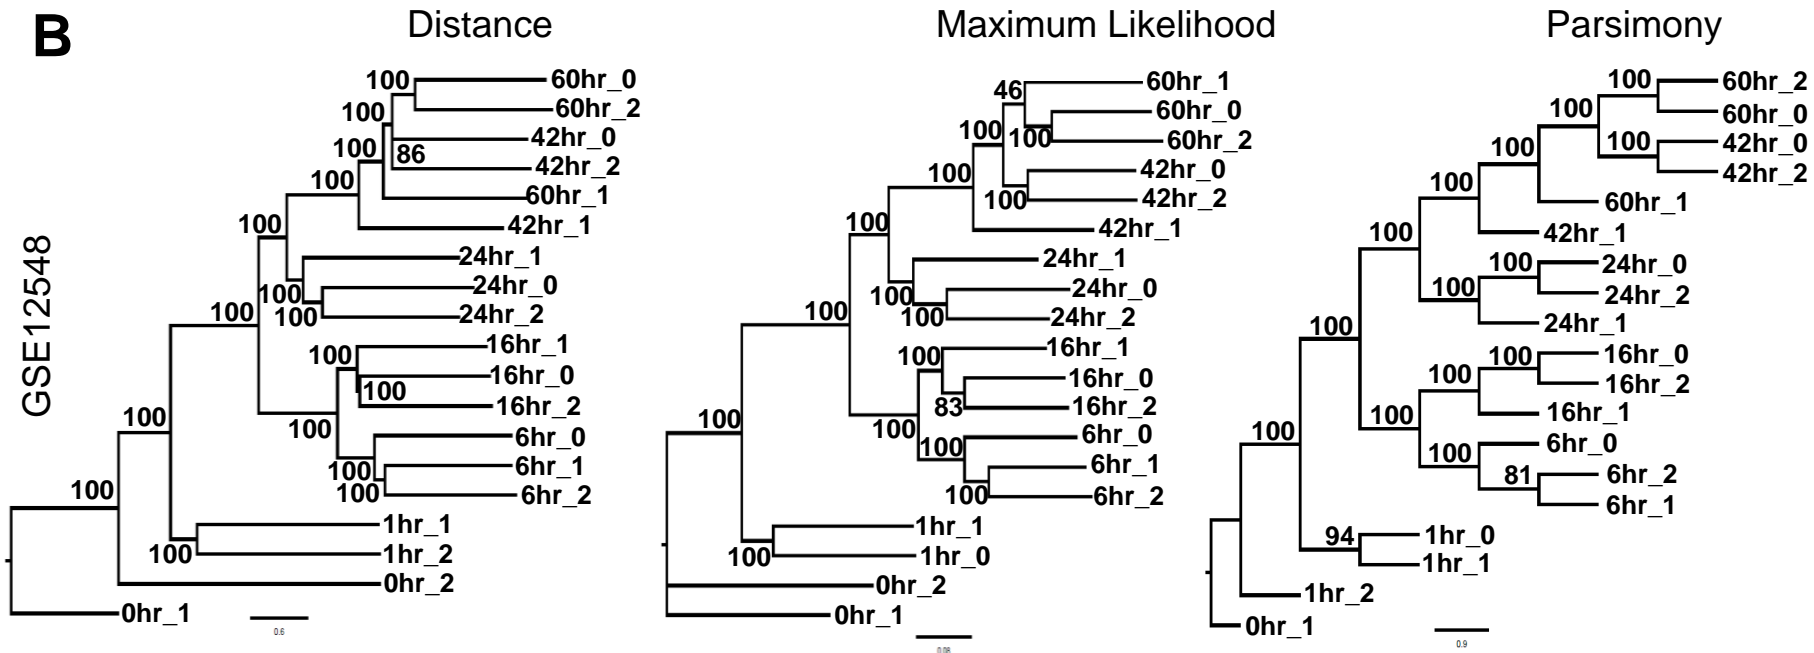

**A**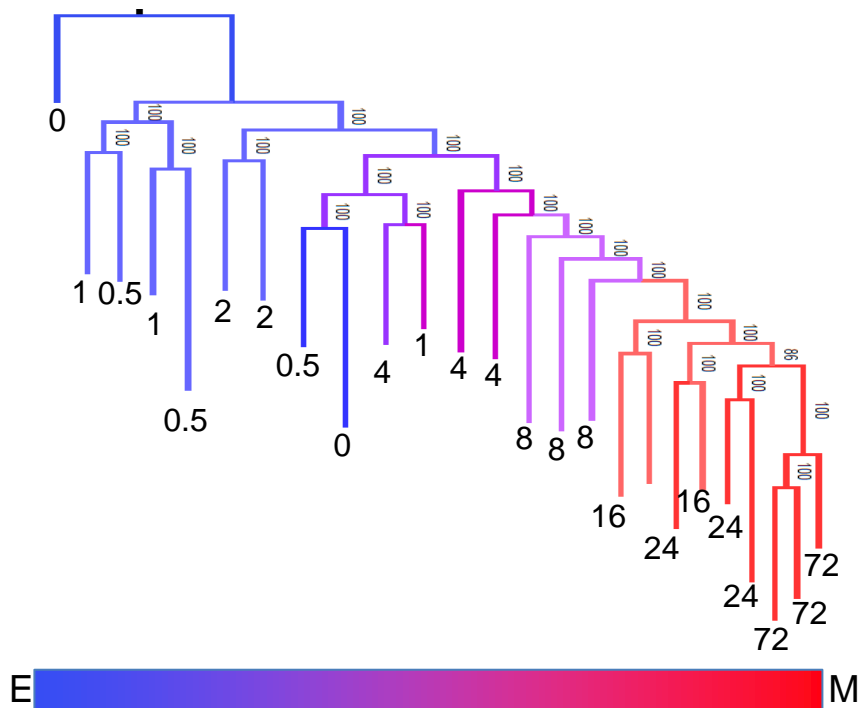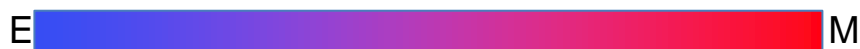**B**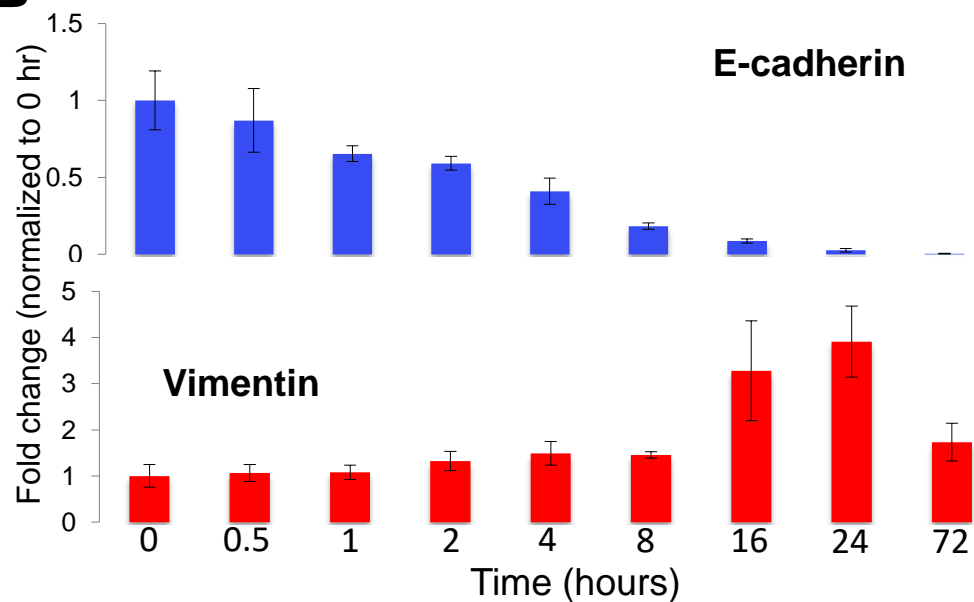**C**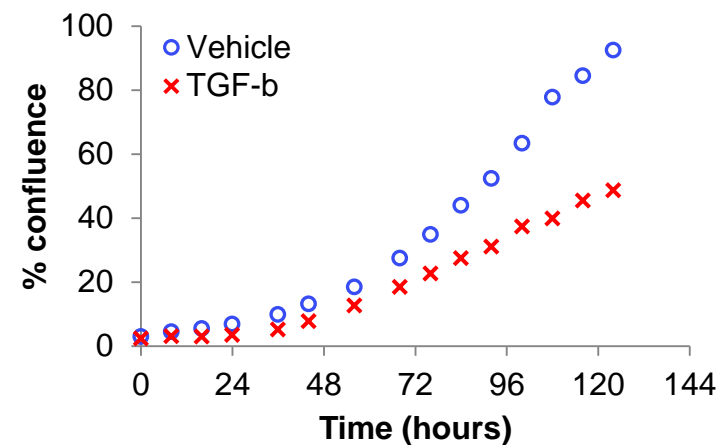**D**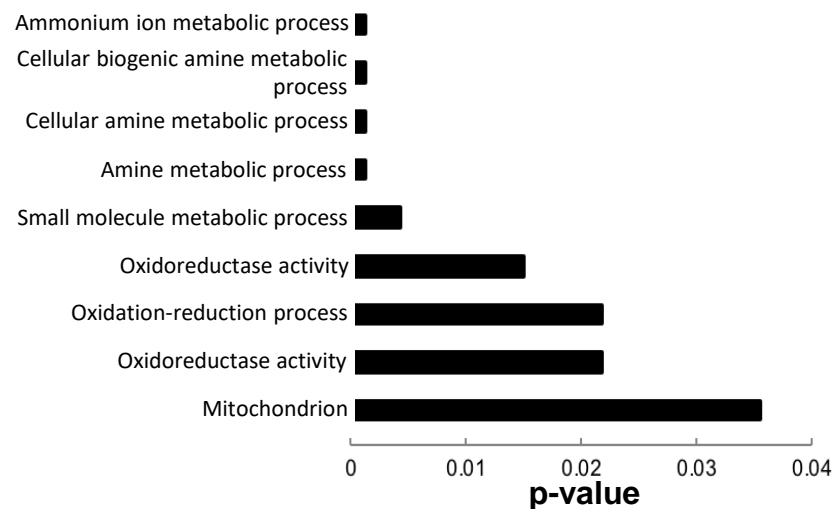**E**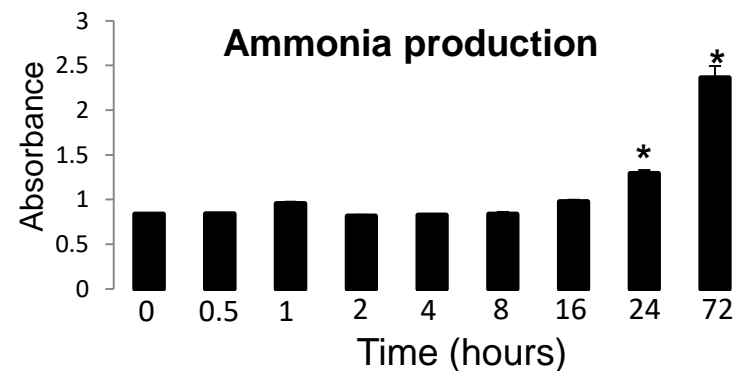

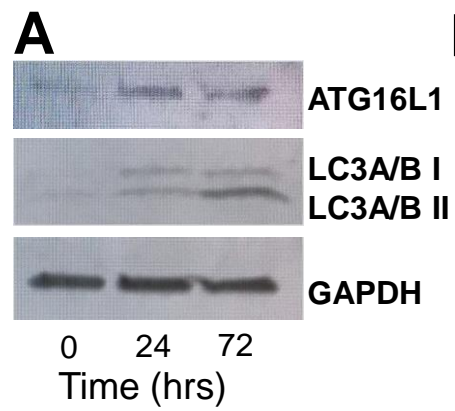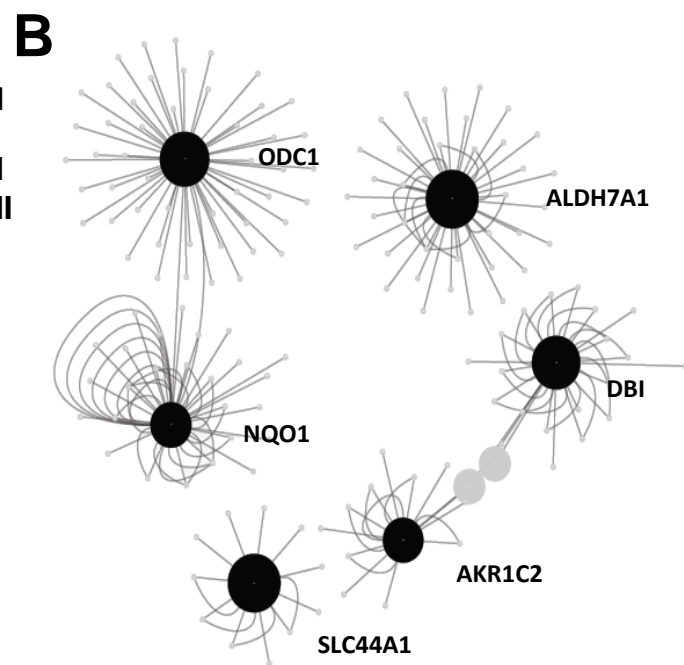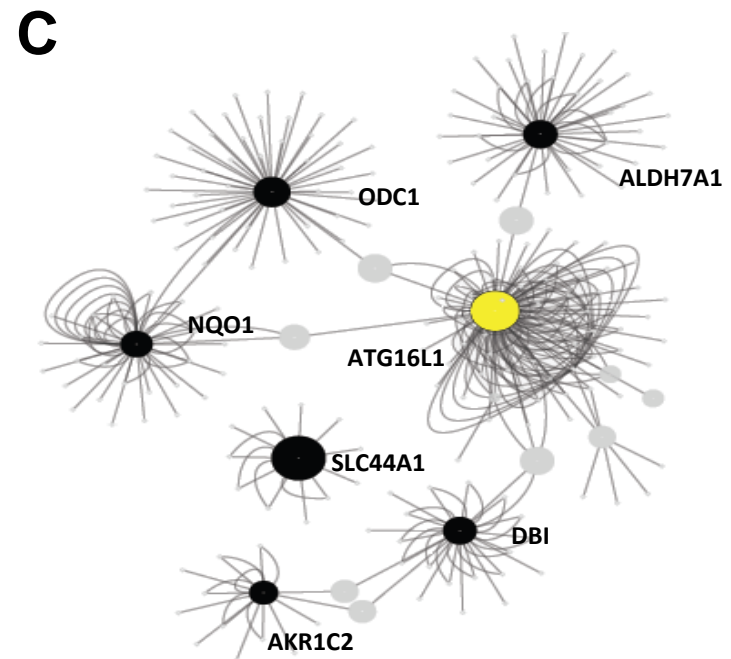

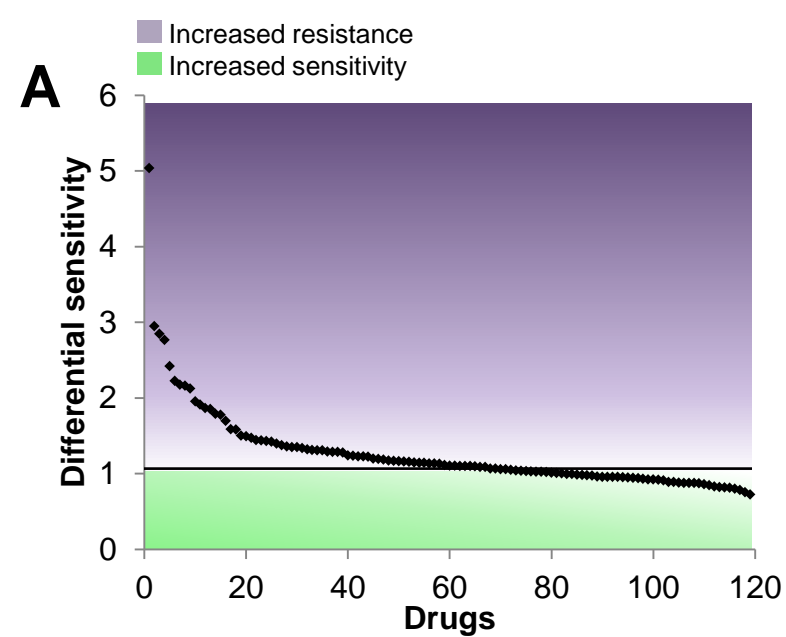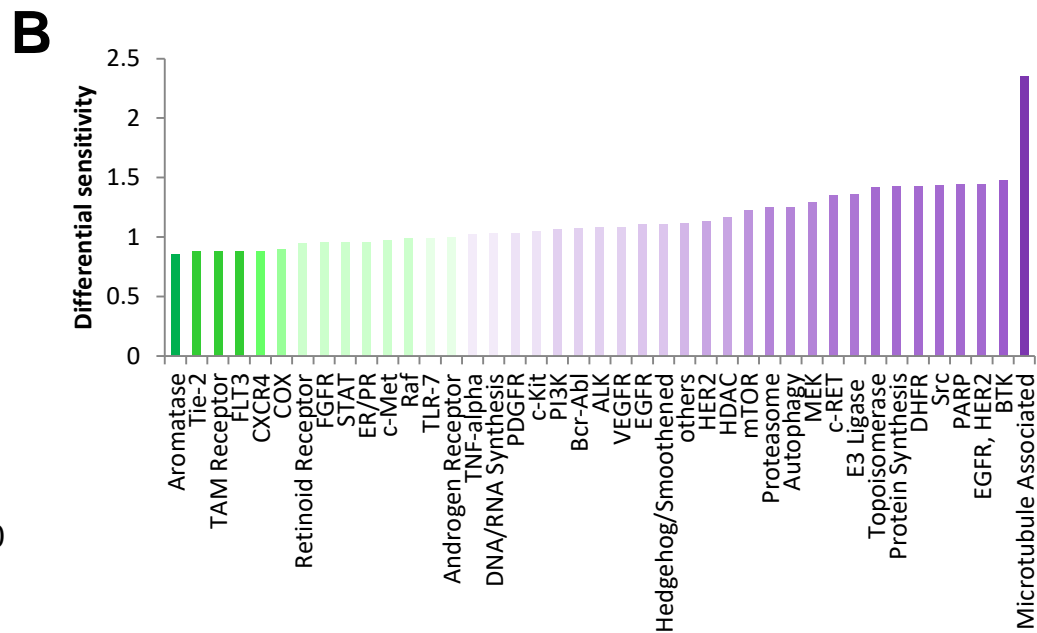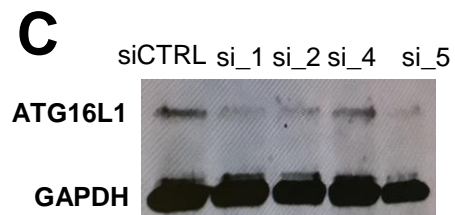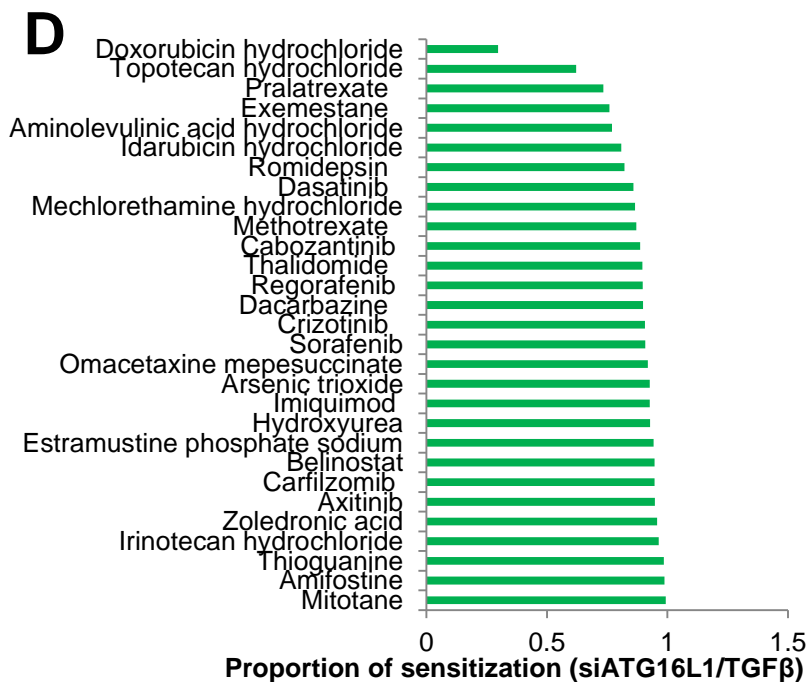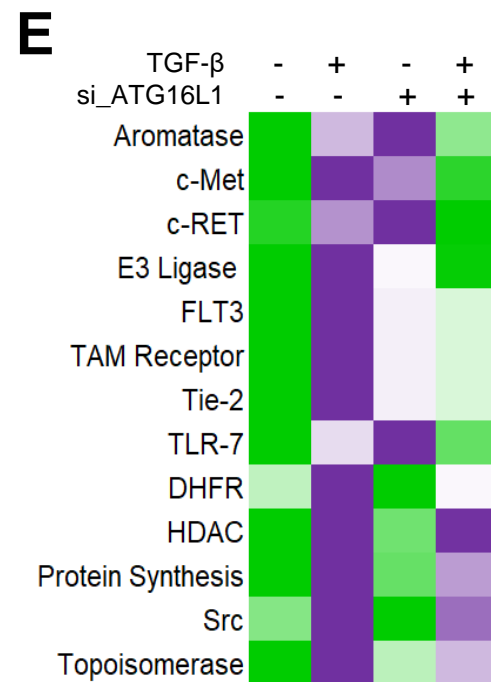

# TGF- $\beta$

## A

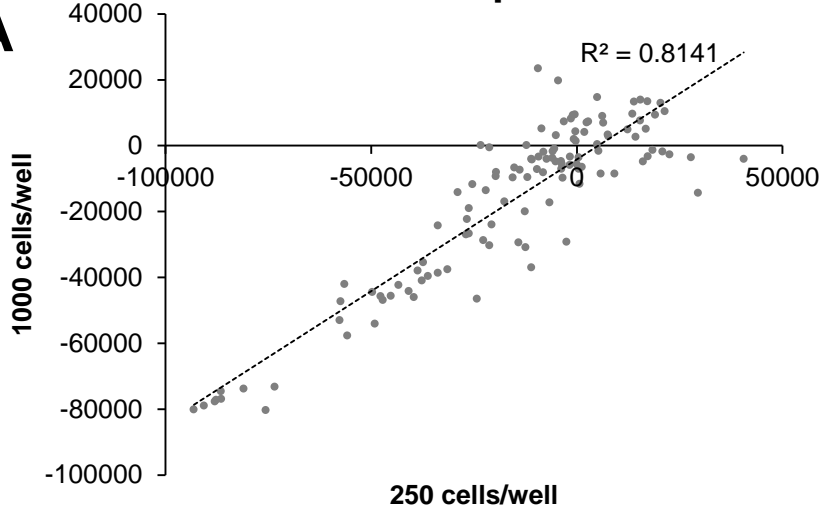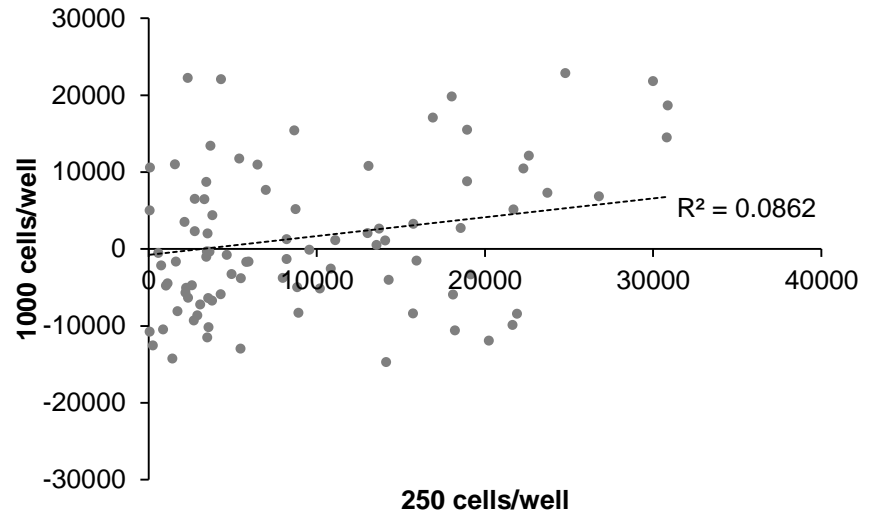

## B

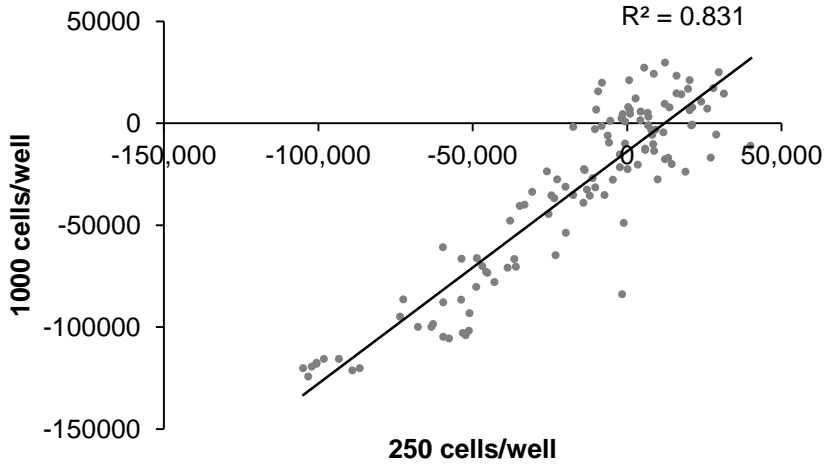

## D

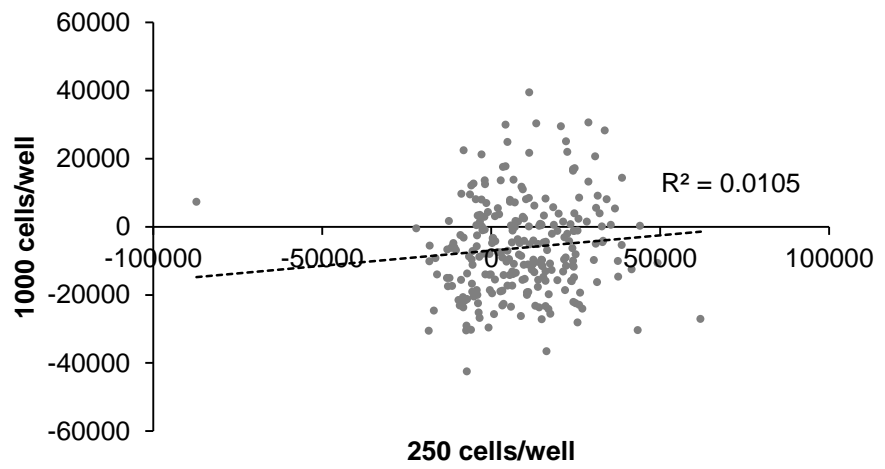

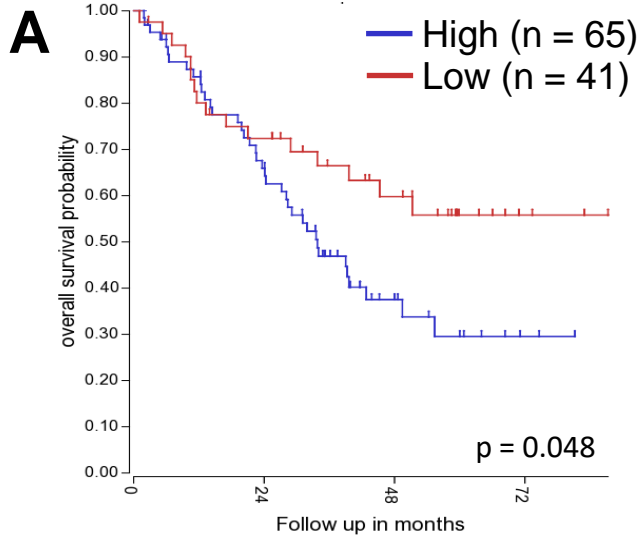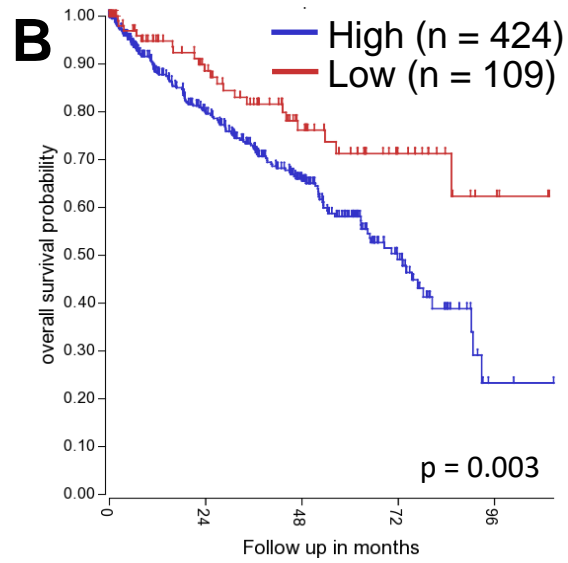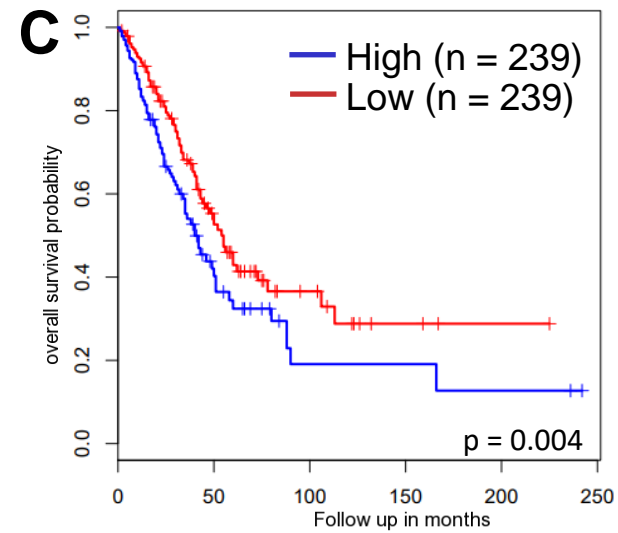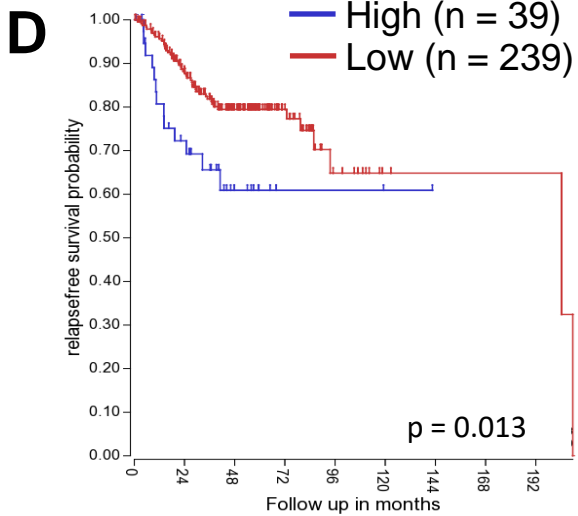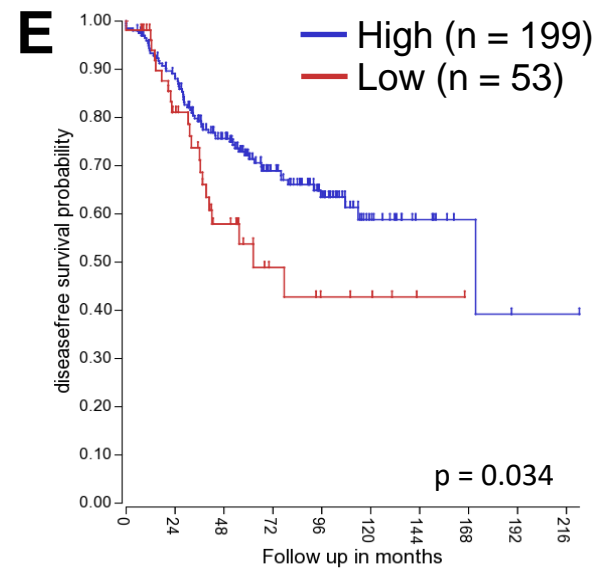

Source: https://www.biorxiv.org/content/10.1101/365833v1.full.pdf
